# Supplementary material for: Wafer-sized polycrystalline diamond photodetector planar arrays for solar-blind imaging
Source: Royal Society of Chemistry journal article supplement (doi:10.1039/d2tc00327a), 2022-01-01
Supplement: d2tc00327a1.pdf [file d2tc00327a1.pdf]

## Wafer-Sized Polycrystalline Diamond Photodetector Planar Arrays for Solar-Blind Imaging

### Supporting Information

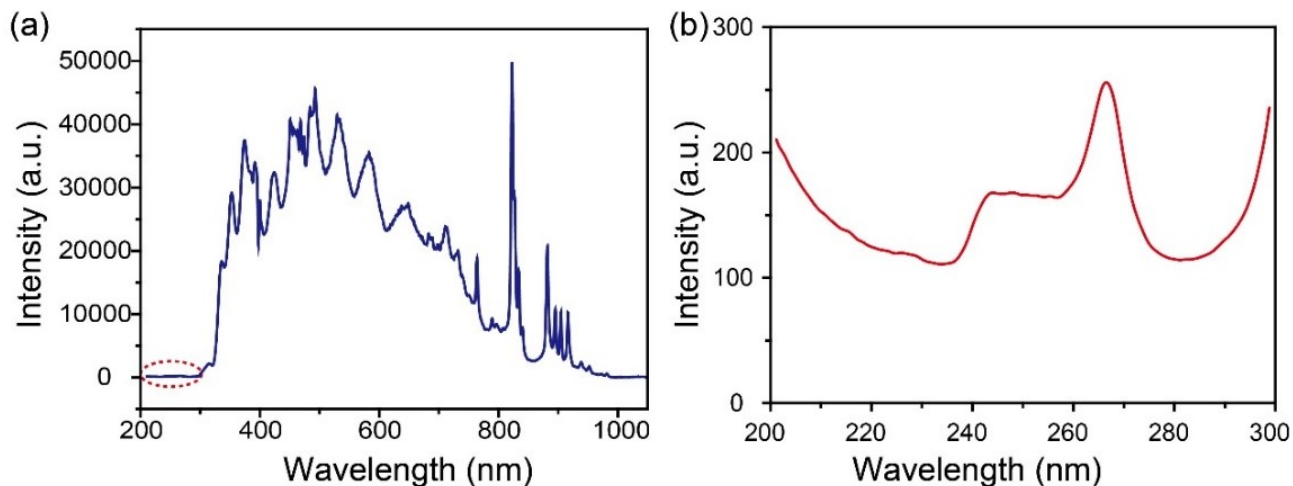

Fig. S1 (a) Spectrum of the laser-driven UV-enhanced light source. (b) Local magnification of the spectrum between 200 and 300 nm.

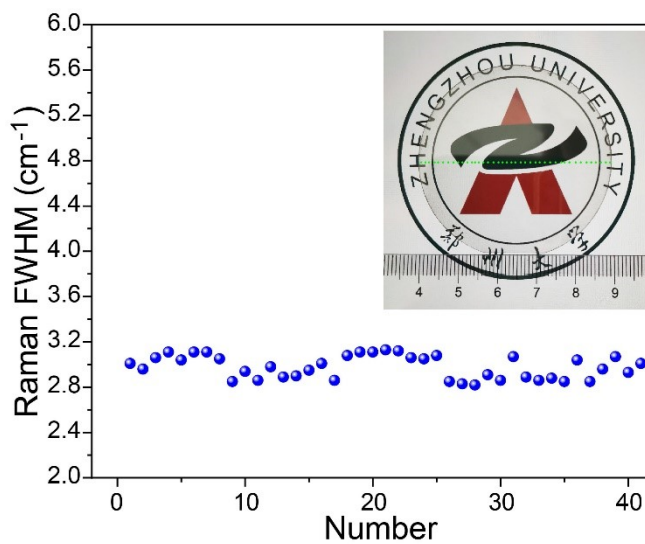

Fig. S2 Statistical results of Raman FWHM of the diamond.

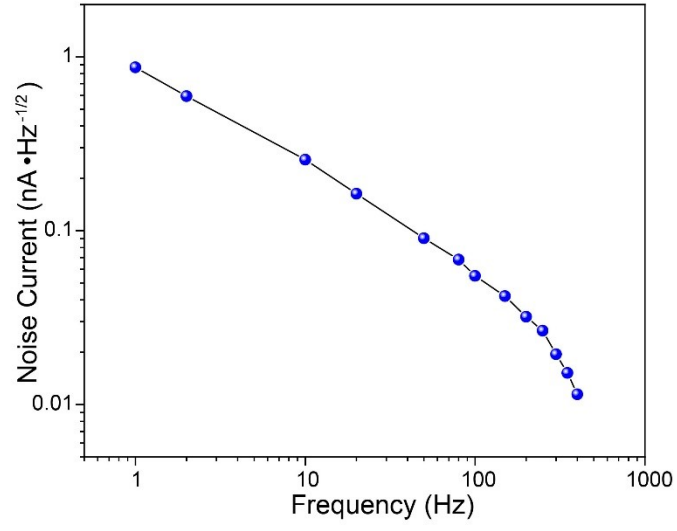

**Fig. S3** Noise current of the photodetector under 30-V bias.
